## External validation of the unifying concept for the quantitative assessment of secondary mitral regurgitation

Albuquerque F.; Lopes P.; Freitas P.; Horta E.; Reis C.; Abecassis J.; Trabulo M.; Ferreira A.; Canada M.; Ribeiras R.; Mendes M.; Joao Andrade M.

Hospital Santa Cruz, Carnaxide, Portugal

**Funding Acknowledgements:** Type of funding sources: None.

**Background:** A Unifying Concept for the Quantitative Assessment of Secondary Mitral Regurgitation (SMR) was recently proposed in order to provide a solution for the ongoing guideline controversy. However, these data were derived from a single center cohort and lacks external validation. We aimed to validate the proposed algorithm in a different patient population.

**Methods:** Patients with at least mild SMR and reduced left ventricular ejection fraction ( $< 50\%$ ) under optimal guideline-directed medical therapy were retrospectively identified at a single-center. The cohort was stratified in low-risk (effective regurgitant orifice area [EROA]  $< 20$  mm<sup>2</sup> and regurgitant volume [RegVol]  $< 30$  ml), intermediate-risk (EROA 20 to 29 mm<sup>2</sup> and RegVol 30 to 44 ml) and high-risk (EROA  $\geq 30$  mm<sup>2</sup> and RegVol  $\geq 45$  ml) according to the defined risk-based thresholds tailored to the pathophysiological concept of SMR. In the intermediate-risk group, patients were further stratified on the basis of the hemodynamic severity of SMR, into intermediate low-risk and intermediate high-risk (regurgitant fraction  $< 50\%$  or  $\geq 50\%$ , respectively). The primary endpoint was all-cause mortality.

**Results:** A total of 572 patients (median age 70 years; 76% male) were included. Median LVEF was 35% (IQR 28-40) and LVEDV was 169 ml (IQR 132-215). Median measures of SMR severity were EROA of 14 mm<sup>2</sup> (IQR 8-22) and RegVol of 23 ml (12-34). During a median follow-up of 3.8 years (interquartile range: 1.8 to 6.2 years) there were 254 deaths (44%). The mortality at 6-years was 38.9% for the low-risk group, 30.7% for the intermediate low-risk, 64.9% in the intermediate high-risk and 63.2% in the high-risk group. On multivariable analysis, the defined thresholds of risk for SMR severity remained independently associated with all-cause mortality (adjusted hazard ratio: 1.164; 95% confidence interval [CI]: 1.020 to 1.327;  $P = 0.024$ ). The unifying concept showed similar discriminative power (C-statistic 0.588; 95% CI: 0.540 to 0.635) to the American (C-statistic 0.588; 95% CI: 0.541 to 0.635;  $P$  for comparison = 1) and European guidelines (C-statistic 0.563; 95% CI: 0.515 to 0.610;  $P$  for comparison = 0.458), but it was able to increase the net reclassification index (0.143 [ $P < .001$ ] and 0.026 [ $P = .025$ ], respectively).

**Conclusions:** In this cohort of patients with SMR and LVEF  $< 50\%$ , the proposed unifying concept based on combined assessment of the EROA, the RegVol, and the RegFrac proved to be associated with an increased risk of all-cause mortality and could improve risk prediction of current guidelines.

Abstract Figure.

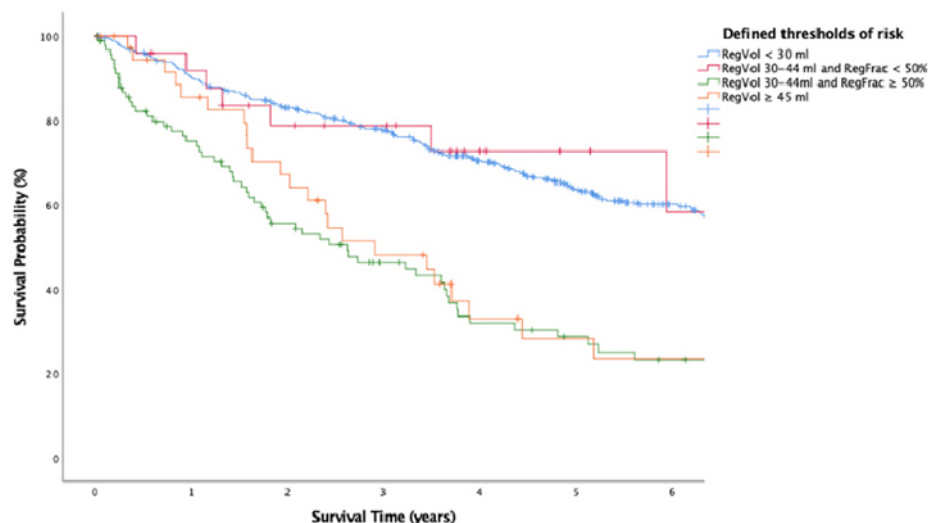

Source: http://academic.oup.com/ehjcimaging/article-pdf/22/Supplement_1/jeaa356.082/36215260/jeaa356.082.pdf
